# Supplementary material for: Template-jumping prime editing enables large insertion and exon rewriting in vivo
Source: PubMed Central journal article supplement (PMC10250319; doi:10.1038/s41467-023-39137-6), 2023-06-08
Supplement: 41467_2023_39137_MOESM1_ESM.pdf [file 41467_2023_39137_MOESM1_ESM.pdf]

## Template-jumping prime editing enables large insertion and exon rewriting *in vivo*

Chunwei Zheng<sup>1#</sup>, Bin Liu<sup>1#</sup>, Xiaolong Dong<sup>1</sup>, Nicholas Gaston<sup>1</sup>, Erik J. Sontheimer<sup>1-3\*</sup>, Wen Xue<sup>1-4\*</sup>

<sup>1</sup>RNA Therapeutics Institute, University of Massachusetts Chan Medical School, Worcester, MA 01605, USA.

<sup>2</sup>Department of Molecular Medicine, University of Massachusetts Chan Medical School, Worcester, MA 01605, USA.

<sup>3</sup>Li Weibo Institute for Rare Diseases Research, University of Massachusetts Chan Medical School, Worcester, MA 01605, USA.

<sup>4</sup>Department of Molecular, Cell and Cancer Biology, University of Massachusetts Chan Medical School, Worcester, MA 01605, USA.

# Equal contributions to this study

\*Corresponding author: Erik J. Sontheimer (erik.sontheimer@umassmed.edu), Wen Xue (wen.xue@umassmed.edu)





**Fig.S2**

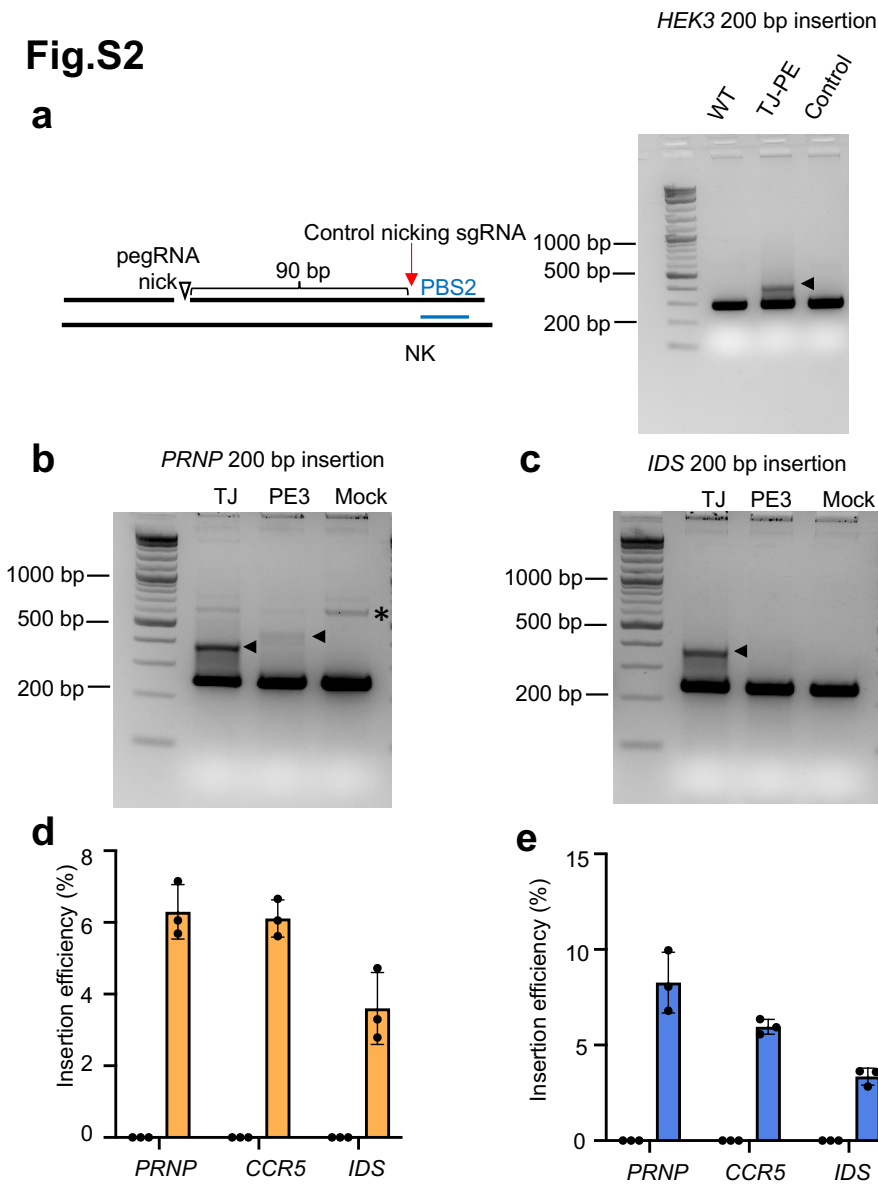

**Supplementary Fig. 2. TJ-PE mediates insertions at multiple genomic loci and cell lines.** **a**, New control nicking sgRNA designed to nick at the same position as nicking sgRNA, but on the opposite strand at the *HEK3* locus. The insertion band of the expected size was observed following TJ-PE treatment (arrow), but not controls. Experiments were done three times, and one is shown. **b**, Insertion of a 200-bp DNA fragment with concomitant deletion of 72 bp at *PRNP* locus in HEK293T cells. The insertion bands of expected size are indicated with arrows. The nonspecific bands are indicated with asterisk. Experiments were done three times, and one is shown. **c**, Insertion of a 200-bp DNA fragment with concomitant deletion of 70 bp at *IDS* locus. The insertion bands of the expected size are indicated with arrows. Experiments were done three times, and one is shown. **d**, Insertion of a 200-bp DNA fragment measured by ddPCR at multiple loci in U-2 OS cells. PE plasmid served as negative control. **e**, Insertion of a 200-bp DNA fragment measured by ddPCR at multiple loci in A549 cells. PE plasmid served as control. Results were obtained from three independent experiments, shown as mean  $\pm$  s.d.

**Fig.S3**

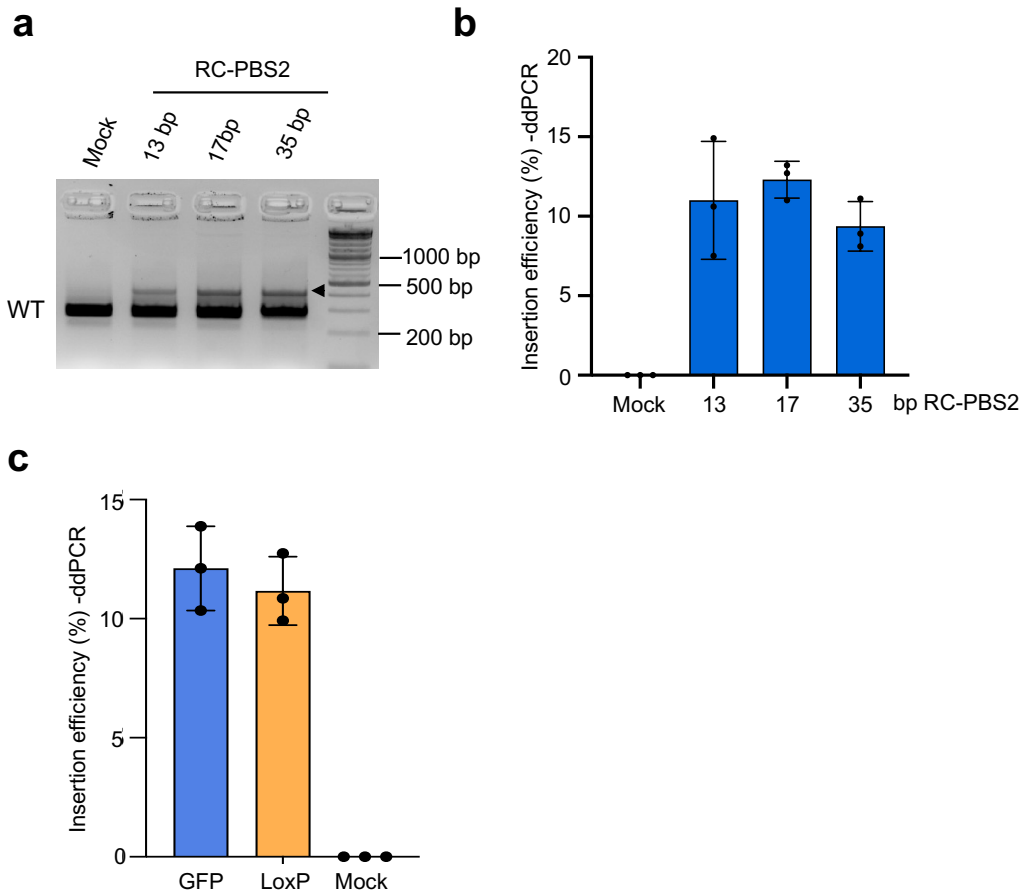

**Supplementary Fig. 3. Comparison of the insertion efficiencies of the different lengths of PBS2 sequence or secondary structure.** **a**, Agarose gel shows the insertion band of the expected size for TJ-pegRNA with 13, 17 or 35-bp RC-PBS2 at the *HEK3* locus (arrow). **b**, Insertion efficiency of a 200-bp DNA fragment with various lengths of PBS2 measured by ddPCR. **c**, Comparing insertion of GFP fragments without or with a hairpin (LoxP) at the *HEK3* locus. Insertion efficiency was quantified by ddPCR. Results were obtained from three independent experiments, shown as mean  $\pm$  s.d.

**Fig.S4**

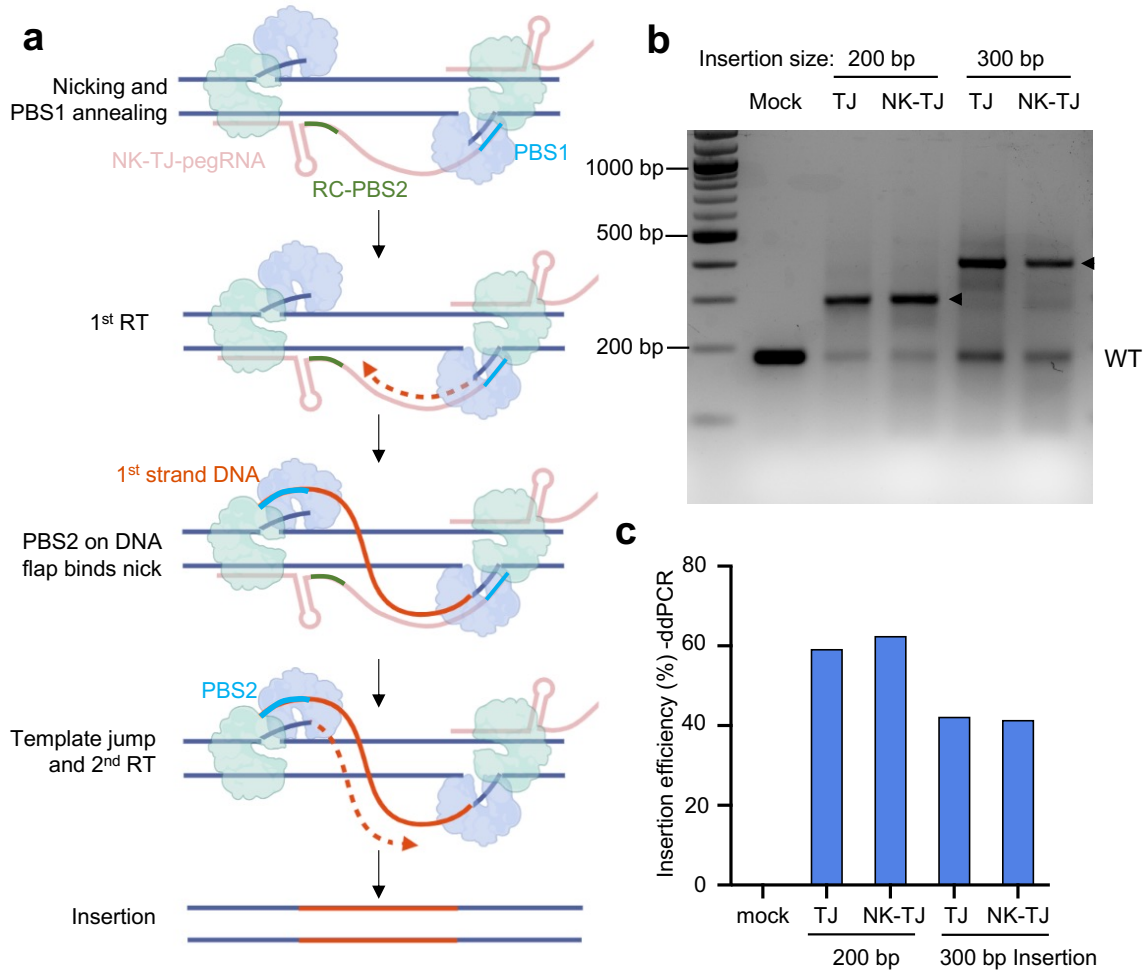

**Supplementary Fig. 4. NK-TJ-pegRNA enables comparable insertion efficiency with TJ-pegRNA.** **a**, Illustration of nicking-TJ-pegRNA (NK-TJ-pegRNA), which contains PBS1, RC-PBS2 and an insertion sequence. Compared to TJ-pegRNA, the PBS1 sequence of NK-TJ-pegRNA first hybridizes to the DNA flap generated by the nicking sgRNA. The newly synthesized PBS2 hybridizes to the second nicked site generated by NK-TJ-pegRNA to initiate the second strand synthesis. **b**, Agarose Gel shows insertion bands of expected sizes (200 bp and 300 bp) at AAVS1 locus. **c**, Insertion efficiency quantified by ddPCR.

**Fig.S5**

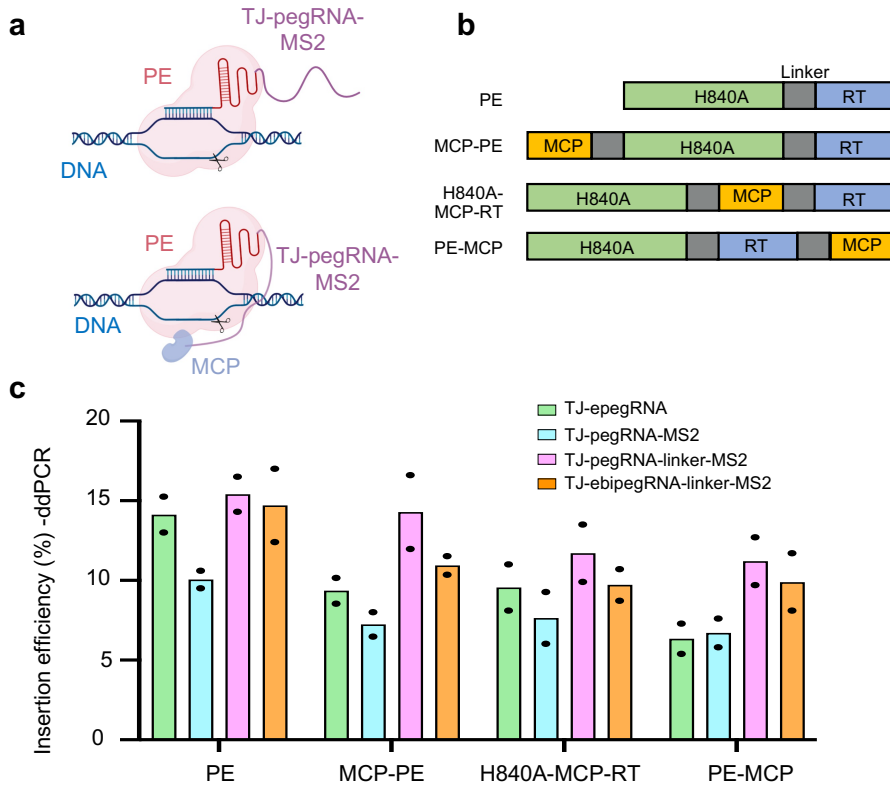

**Supplementary Fig. 5. TJ-pegRNA with 3'-RNA aptamer.** **a**, Diagram of pegRNA with 3'-RNA aptamer. **b**, Structure of the MCP and PE fusion protein. Schematic representations of PE-MCP fusion proteins. **c**, Insertion efficiency quantified by ddPCR at *HEK3* locus. Results were obtained from two independent experiments.

**Fig. S6**

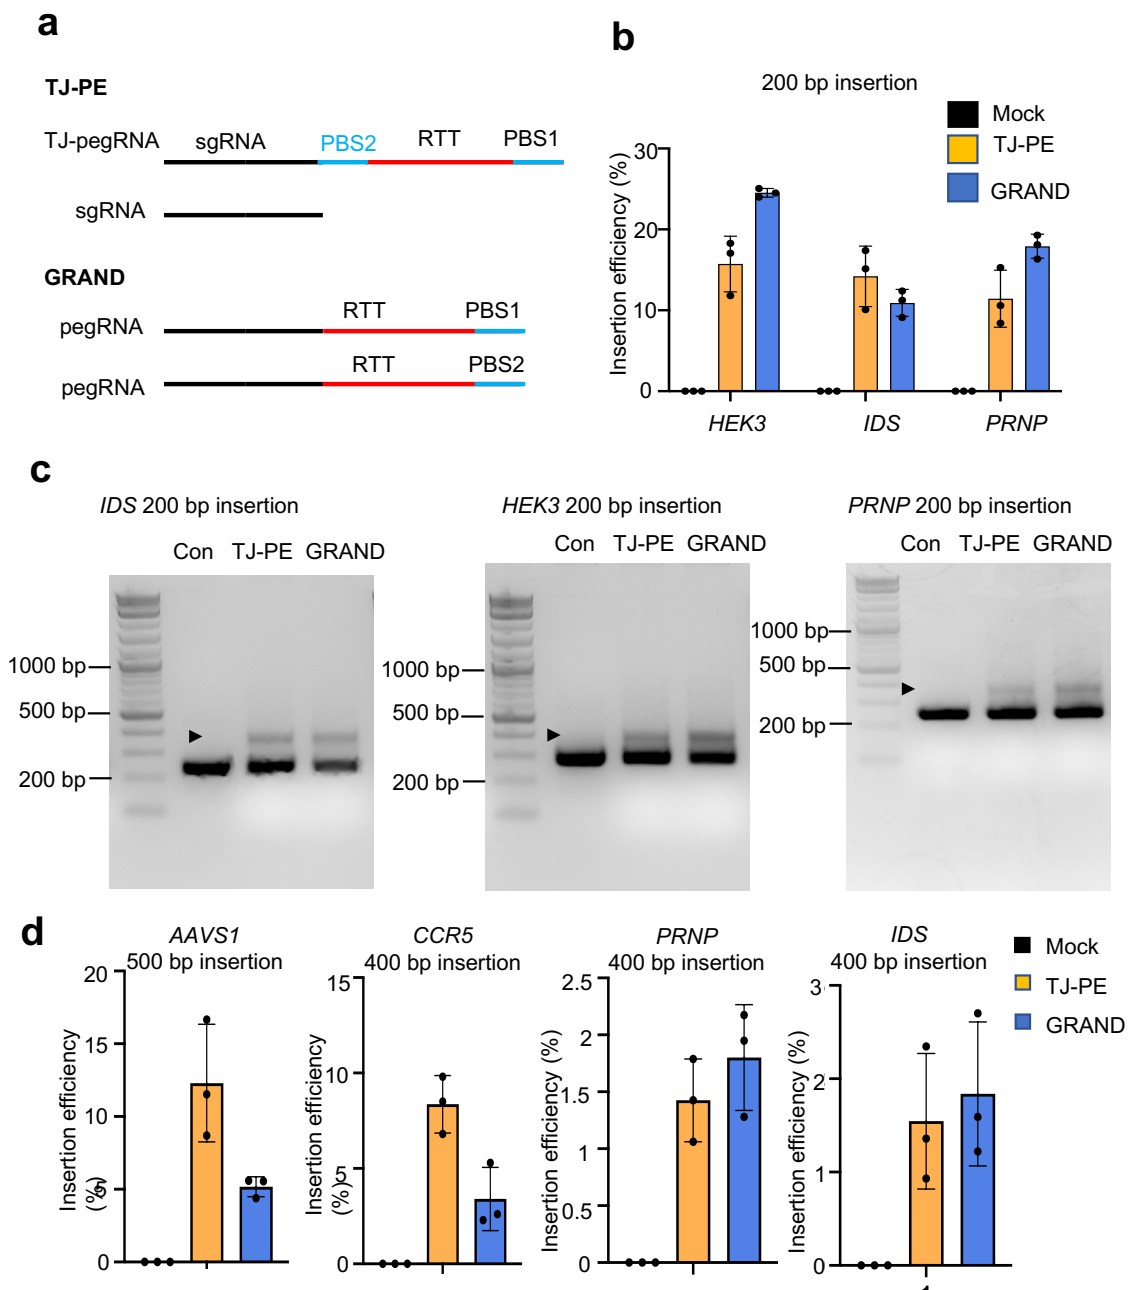

**Supplementary Fig. 6. Comparison of insertion efficiencies mediated by GRAND and TJ-PE.** **a**, Illustration of TJ-pegRNA and GRAND pegRNAs. **b**, Insertion of 200-bp DNA fragment with TJ-PE or GRAND editing at *HEK3*, *IDS* and *PRNP* loci in HEK293T cells. **c**, Agarose gel shows insertion bands of expected sizes (arrows). **d**, Insertion of DNA fragment at *AAVS1* (500-bp), *CCR5* (400-bp), *PRNP* (400-bp) and *IDS* (400-bp) loci. Insertion efficiency was quantified by ddPCR. Results were obtained from three independent experiments, shown as mean  $\pm$  s.d.



**Fig.S7**

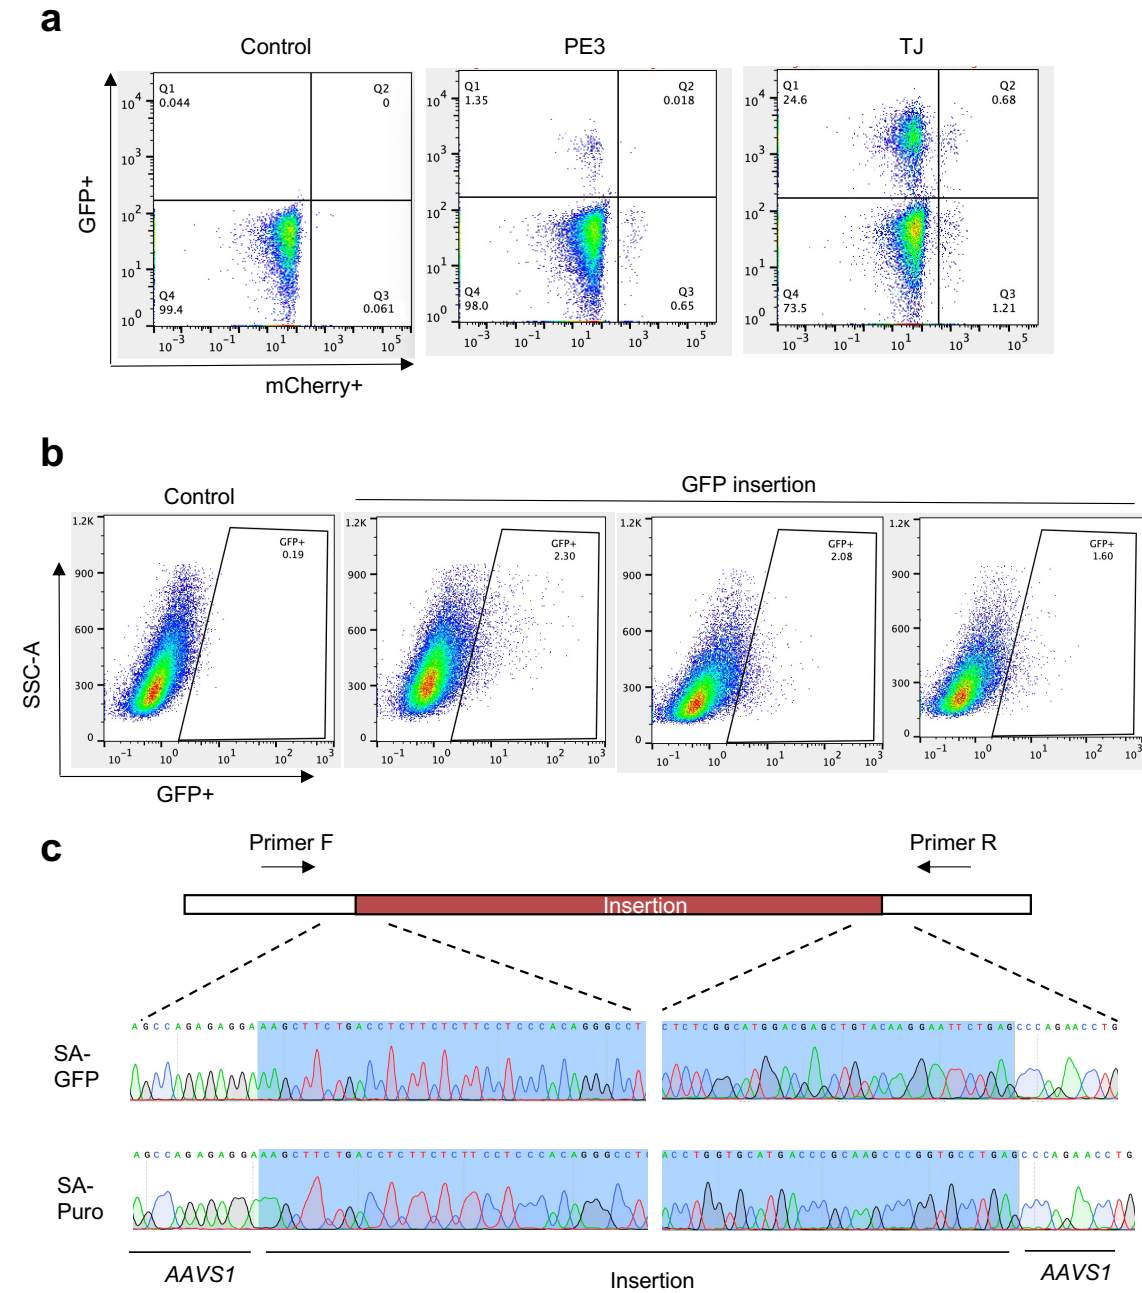

**Supplementary Fig. 7. TJ-pegRNA mediates GFP reporter repair and functional gene insertion.** **a**, Flow cytometry plots show the gating of TLR-MCV1 cells in control, PE3 and TJ-PE treated groups. **b**, Flow cytometry plots show the gating of GFP expression cells. **c**, Sanger sequence of SA-GFP and SA-Puro insertion. The insertion bands of predicted size were gel purified. Sanger sequencing shows precise insertions.



**Fig.S9**

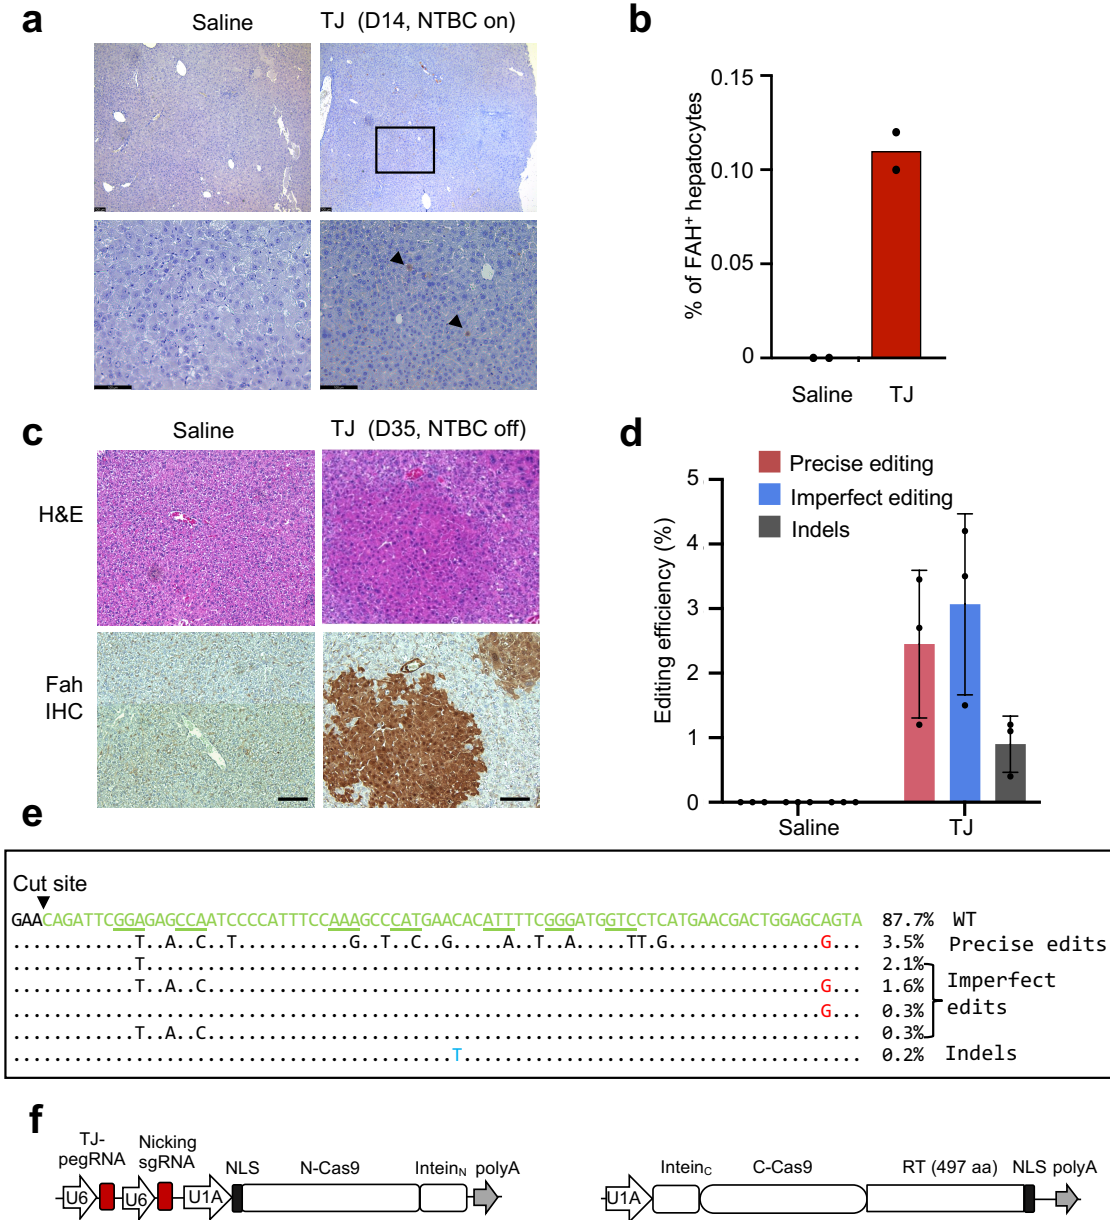

**Supplementary Fig. 9. TJ-PE rewrites a correction exon in mouse liver.** **a**, IHC staining of liver sections from *Fah*-mutant mice 14 days after TJ-PE treatment. FAH<sup>+</sup> hepatocytes are indicated by arrows; scale bar, 100  $\mu$ m. The lower panel of TJ is a high-magnification view (box with black line). Experiments were done two times, and one is shown. **b**, Quantification of FAH<sup>+</sup> hepatocytes by IHC two weeks after hydrodynamic injection. (n=2 mice). **c**, Hematoxylin and eosin (H&E) staining and FAH Immunohistochemistry (IHC) staining of mouse liver sections 35 days after NTBC withdrawal. Experiments were done three times, and one is shown. Scale bar, 100  $\mu$ m. **d**, Amplicon sequencing of exon 8 from TJ-PE-treated mouse livers two months after NTBC withdrawal. Results were obtained from three independent experiments, shown as mean  $\pm$  s.d. **e**, Allele frequencies of a representative liver in **d**. All alleles  $\geq 0.2\%$  are shown. Green: Genomic sequence. Codons are underlined. Black: synonymous mutations in the correction exon. Red: correction G. Blue: indel. **f**, Schematic of the split-intein dual AAV8.

**Fig.S10**

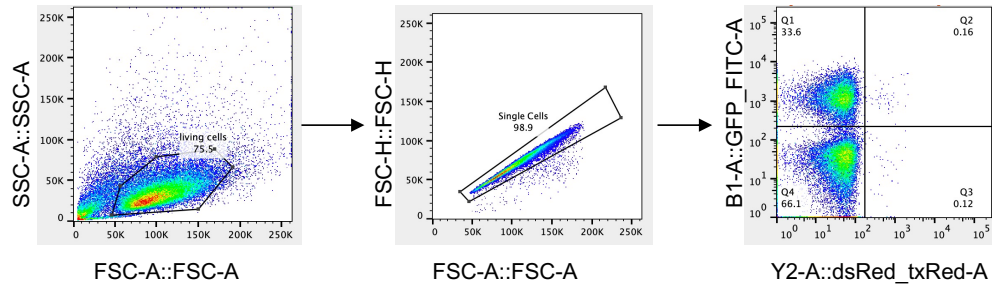

**Supplementary Fig. 10. FACS gating examples for GFP-positive or Cherry-positive cells.**

**Supplementary Table 1.** Sequences of pegRNAs and sgRNAs used in this study.

sgRNA scaffold

GTTTTAGAGCTAGAAATAGCAAGTTAAAATAAGGCTAGTCCGTTATCAACTTGAAAAAGTGGGACCGA  
GTCGGTCC

RC-PBS2-Insertion-PBS1-Tevopreq1

| pegRNA                                  | spacer sequence (5'-3')      | 3' extension                                                                                                                                                                                                                                                                                                                                     |
|-----------------------------------------|------------------------------|--------------------------------------------------------------------------------------------------------------------------------------------------------------------------------------------------------------------------------------------------------------------------------------------------------------------------------------------------|
| <i>AAVSI</i> 200 bp insertion TJ-pegRNA | GATGGAGC<br>CAGAGAG<br>GATCC | GCAGCTCAGGTTCTGGGATAACTTCGTATAATGTATGCTATACGA<br>AGTTATAACAATCCCCAACTGAGAGAACTCAAAGGTTACCCCA<br>GTTGGGGCACATTACCCTGTTATCCCTACCTCGCCGGACACGCTG<br>AACTTGTTGGCCGTTTACGTCGCCGTCCAGCTCGACCAGGATGGGC<br>ACCACCCCGGTGAACAGCTCCTCGCCCTTGCTCACCATTCCTCTCT<br>GGCTCTCTCTCTTTGACGCGGTTCTATCTAGTTACGCGTTAAACC<br>AACTAGAAATTTTTTT                           |
| <i>AAVSI</i> 200 bp insertion pegRNA    | GATGGAGC<br>CAGAGAG<br>GATCC | CCGGGCAGGTCACGCATATAACTTCGTATAATGTATGCTATACGA<br>AGTTATAACAATCCCCAACTGAGAGAACTCAAAGGTTACCCCA<br>GTTGGGGCACATTACCCTGTTATCCCTACCTCGCCGGACACGCTG<br>AACTTGTTGGCCGTTTACGTCGCCGTCCAGCTCGACCAGGATGGGC<br>ACCACCCCGGTGAACAGCTCCTCGCCCTTGCTCACCATTCCTCTCT<br>GGCTCTCTCTCTTTGACGCGGTTCTATCTAGTTACGCGTTAAACC<br>AACTAGAAATTTTTTT                           |
| <i>AAVSI</i> 300 bp insertion TJ-pegRNA | GATGGAGC<br>CAGAGAG<br>GATCC | GCAGCTCAGGTTCTGGGATAACTTCGTATAATGTATGCTATACGA<br>AGTTATAACAATCCCCAACTGAGAGAACTCAAAGGTTACCCCA<br>GTTGGGGCACATTACCCTGTTATCCCTATAGGTCAGGGTGGTCAC<br>GAGGGTGGGCCAGGGCACGGGCAGCTTGCCGGTGGTGCAGATGA<br>ACTTCAGGGTCAGCTTGCCGTAGGTGGCATCGCCCTCGCCCTCGC<br>CGGACACGCTGAACTTGTGGCCGTTTACGTCGCCGTCCAGCTCGA<br>CCAGGATGGGCACCACCCCGGTGAACAGCTCCTCGCCCTTGCTCA |

|                                                           |                              |                                                                                                                                                                                                                                                                                                                                                                                                                                                                                                                                                                                                                                                              |
|-----------------------------------------------------------|------------------------------|--------------------------------------------------------------------------------------------------------------------------------------------------------------------------------------------------------------------------------------------------------------------------------------------------------------------------------------------------------------------------------------------------------------------------------------------------------------------------------------------------------------------------------------------------------------------------------------------------------------------------------------------------------------|
|                                                           |                              | CCATTCCTCTCTGGCTCTCTCTCTTGACGCGGTTCTATCTAGTT<br>ACGCGTTAAACCAACTAGAAAATTTTTT                                                                                                                                                                                                                                                                                                                                                                                                                                                                                                                                                                                 |
| <i>AAVSI</i> 300 bp<br>insertion<br>pegRNA                | GATGGAGC<br>CAGAGAG<br>GATCC | CCGGGCAGGTCACGCATATAACTTCGTATAATGTATGCTATACGA<br>AGTTATAACAATCCCCAACTGAGAGAACTCAAAGGTTACCCCA<br>GTTGGGGCACATTACCCTGTTATCCCTATAGGTCAGGGTGGTCAC<br>GAGGGTGGGCCAGGGCACGGGCAGCTTGCCGGTGGTGCAGATGA<br>ACTTCAGGGTCAGCTTGCCGTAGGTGGCATCGCCCTCGCCCTCGC<br>CGGACACGCTGAACTTGTGGCCGTTACGTGCGCCGTCCAGCTCGA<br>CCAGGATGGGCACCACCCGGTGAACAGCTCCTCGCCCTTGCTCA<br>CCATTCCTCTCTGGCTCTCTCTCTTGACGCGGTTCTATCTAGTT<br>ACGCGTTAAACCAACTAGAAAATTTTTT                                                                                                                                                                                                                              |
| <i>AAVSI</i> 500 bp<br>insertion TJ-<br>pegRNA            | GATGGAGC<br>CAGAGAG<br>GATCC | GCAGCTCAGGTTCTGGGATAACTTCGTATAATGTATGCTATACGA<br>AGTTATAACAATCCCCAACTGAGAGAACTCAAAGGTTACCCCA<br>GTTGGGGCACATTACCCTGTTATCCCTACCTCCTTGAAGTCGATG<br>CCCTTCAGCTCGATGCGGTTACCAGGGTGTGCGCCCTCGAACTTC<br>ACCTCGGCGCGGGTCTTGTAGTTGCCGTGCTCCTGAAGAAGATG<br>GTGCGCTCCTGGACGTAGCCTTCGGGCATGGCGGACTTGAAGAA<br>GTCGTGCTGCTTCATGTGGTTCGGGGTAGCGGCTGAAGCACTGCAC<br>GCCGTAGGTCAGGGTGGTCACGAGGGTGGGCCAGGGCACGGGCA<br>GCTTGCCGGTGGTGCAGATGAACTTCAGGGTCAGCTTGCCGTAGG<br>TGGCATCGCCCTCGCCCTCGCCGACACGCTGAACTTGTGGCCGT<br>TTACGTGCGCCGTCCAGCTCGACCAGGATGGGCACCACCCCGGTGA<br>ACAGCTCCTCGCCCTTGCTACCATTCCTCTCTGGCTCTCTCTC<br>TTGACGCGGTTCTATCTAGTTACGCGTTAAACCAACTAGAAAATTT<br>TTTT |
| <i>AAVSI</i> 500 bp<br>insertion<br>pegRNA                | GATGGAGC<br>CAGAGAG<br>GATCC | CCGGGCAGGTCACGCATATAACTTCGTATAATGTATGCTATACGA<br>AGTTATAACAATCCCCAACTGAGAGAACTCAAAGGTTACCCCA<br>GTTGGGGCACATTACCCTGTTATCCCTACCTCCTTGAAGTCGATG<br>CCCTTCAGCTCGATGCGGTTACCAGGGTGTGCGCCCTCGAACTTC<br>ACCTCGGCGCGGGTCTTGTAGTTGCCGTGCTCCTGAAGAAGATG<br>GTGCGCTCCTGGACGTAGCCTTCGGGCATGGCGGACTTGAAGAA<br>GTCGTGCTGCTTCATGTGGTTCGGGGTAGCGGCTGAAGCACTGCAC<br>GCCGTAGGTCAGGGTGGTCACGAGGGTGGGCCAGGGCACGGGCA<br>GCTTGCCGGTGGTGCAGATGAACTTCAGGGTCAGCTTGCCGTAGG<br>TGGCATCGCCCTCGCCCTCGCCGACACGCTGAACTTGTGGCCGT<br>TTACGTGCGCCGTCCAGCTCGACCAGGATGGGCACCACCCCGGTGA<br>ACAGCTCCTCGCCCTTGCTACCATTCCTCTCTGGCTCTCTCTC<br>TTGACGCGGTTCTATCTAGTTACGCGTTAAACCAACTAGAAAATTT<br>TTTT |
| <i>HEK3</i> 200 bp<br>insertion TJ-<br>pegRNA             | GGCCCAGA<br>CTGAGCAC<br>GTGA | GTCAACCAGTATCCCGGATGGTGAGCAAGGGCGAGGAGCTGTTT<br>ACCGGGTGGTGCCCATCCTGGTCGAGCTGGACGGCGACGTAAA<br>CGGCCACAAGTTCAGCGTGTCCGGCGAGGGCGAGGGCGATGCCA<br>CCTACGGCAAGCTGACCCTGAAGTTCATCTGCACCACCGGCAAGC<br>TGCCCGTGCCCTGGCCACCCTCGTGACCACCCTGACCTACGTGC<br>TCAGTCTGTAGACACACGCGGTTCTATCTAGTTACGCGTTAAACC<br>AACTAGAAATTTTTTT                                                                                                                                                                                                                                                                                                                                            |
| <i>HEK3</i> 200 bp<br>insertion<br>control PBS2<br>pegRNA | GGCCCAGA<br>CTGAGCAC<br>GTGA | CCTTTCCTCTGCCATCAATGGTGAGCAAGGGCGAGGAGCTGTTCA<br>CCGGGGTGGTGCCCATCCTGGTCGAGCTGGACGGCGACGTAAAC<br>GGCCACAAGTTCAGCGTGTCCGGCGAGGGCGAGGGCGATGCCAC<br>CTACGGCAAGCTGACCCTGAAGTTCATCTGCACCACCGGCAAGCT<br>GCCCCTGCCCTGGCCACCCTCGTGACCACCCTGACCTACGTGCT<br>CAGTCTGTAGACACACGCGGTTCTATCTAGTTACGCGTTAAACCA<br>ACTAGAAATTTTTTT                                                                                                                                                                                                                                                                                                                                           |
| <i>PRNP</i> 200 bp<br>insertion TJ-<br>pegRNA             | GCAGTGGT<br>GGGGGGCC<br>TTGG | GCATGTTTTACGATAGATGGTGAGCAAGGGCGAGGAGCTGTTT<br>ACCGGGTGGTGCCCATCCTGGTCGAGCTGGACGGCGACGTAAA<br>CGGCCACAAGTTCAGCGTGTCCGGCGAGGGCGAGGGCGATGCCA                                                                                                                                                                                                                                                                                                                                                                                                                                                                                                                   |

|                                        |                              |                                                                                                                                                                                                                                                                                                                                                                                                                                                                                                                                                   |
|----------------------------------------|------------------------------|---------------------------------------------------------------------------------------------------------------------------------------------------------------------------------------------------------------------------------------------------------------------------------------------------------------------------------------------------------------------------------------------------------------------------------------------------------------------------------------------------------------------------------------------------|
|                                        |                              | CCTACGGCAAGCTGACCCTGAAGTTCATCTGCACCACCGGCAAGC<br>TGCCCGTGCCCTGGCCACCCTCGTGACCACCCTGACCTAAGGCC<br>CCCCACCACTCTCTCTCTTGAAGCGGTTCTATCTAGTTACGCGTTAA<br>ACCAACTAGAAAATTTTTTT                                                                                                                                                                                                                                                                                                                                                                          |
| PRNP 200 bp<br>insertion<br>pegRNA     | GCAGTGGT<br>GGGGGGCC<br>TTGG | CCAGCATGTAGCCGCAATGGTGAGCAAGGGCGAGGAGCTGTTC<br>ACCGGGGTGGTGCCCATCCTGGTCGAGCTGGACGGCGACGTAAA<br>CGGCCACAAGTTCAGCGTGTCCGGCGAGGGCGAGGGCGATGCCA<br>CCTACGGCAAGCTGACCCTGAAGTTCATCTGCACCACCGGCAAGC<br>TGCCCGTGCCCTGGCCACCCTCGTGACCACCCTGACCTAAGGCC<br>CCCCACCACTCTCTCTCTTGAAGCGGTTCTATCTAGTTACGCGTTAA<br>ACCAACTAGAAAATTTTTTT                                                                                                                                                                                                                           |
| IDS 200 bp<br>insertion TJ-<br>pegRNA  | GCATTTTC<br>GATTCCGT<br>GACT | ACTGAGGGATGTCTGAAATGGTGAGCAAGGGCGAGGAGCTGTTC<br>ACCGGGGTGGTGCCCATCCTGGTCGAGCTGGACGGCGACGTAAA<br>CGGCCACAAGTTCAGCGTGTCCGGCGAGGGCGAGGGCGATGCCA<br>CCTACGGCAAGCTGACCCTGAAGTTCATCTGCACCACCGGCAAGC<br>TGCCCGTGCCCTGGCCACCCTCGTGACCACCCTGACCTACACGG<br>AATCGAAATCTCTCTCTTGAAGCGGTTCTATCTAGTTACGCGTTAA<br>ACCAACTAGAAAATTTTTTT                                                                                                                                                                                                                           |
| IDS 200 bp<br>insertion<br>pegRNA      | GCATTTTC<br>GATTCCGT<br>GACT | CGGATCCTTCCAAGTATGGTGAGCAAGGGCGAGGAGCTGTTC<br>CCGGGGTGGTGCCCATCCTGGTCGAGCTGGACGGCGACGTAAAC<br>GGCCACAAGTTCAGCGTGTCCGGCGAGGGCGAGGGCGATGCCAC<br>CTACGGCAAGCTGACCCTGAAGTTCATCTGCACCACCGGCAAGCT<br>GCCCCGTGCCCTGGCCACCCTCGTGACCACCCTGACCTACACGG<br>ATCGAAATCTCTCTCTTGAAGCGGTTCTATCTAGTTACGCGTTAA<br>CCAACTAGAAAATTTTTTT                                                                                                                                                                                                                               |
| CCR5 400 bp<br>Insertion TJ-<br>pegRNA | CTCACTAT<br>GCTGCCG<br>CCAG  | GGTACCTATCGATTGTCATGGTGAGCAAGGGCGAGGAGCTGTTC<br>CCGGGGTGGTGCCCATCCTGGTCGAGCTGGACGGCGACGTAAAC<br>GGCCACAAGTTCAGCGTGTCCGGCGAGGGCGAGGGCGATGCCAC<br>CTACGGCAAGCTGACCCTGAAGTTCATCTGCACCACCGGCAAGCT<br>GCCCCGTGCCCTGGCCACCCTCGTGACCACCCTGACCTACGGCGT<br>GCAGTGCTTCAGCCGCTACCCCGACCACATGAAGCAGCACGACTT<br>CTTCAAGTCCGCCATGCCCCGAAGGCTACGTCCAGGAGCGCACCAT<br>CTTCTTCAAGGACGACGGCAACTACAAGACCCGCGCCGAGGTGA<br>AGTTCGAGGGCGACACCCTGGTGAACCGCATCGAGCTGAAGGTA<br>GGGATAACAGGGTAATGGCGGCAGCATAAGTCTCTCTCTTGAAGCG<br>GTTCTATCTAGTTACGCGTTAAACCAACTAGAAAATTTTTTT |
| IDS 400 bp<br>Insertion TJ-<br>pegRNA  | GCATTTTC<br>GATTCCGT<br>GACT | ACTGAGGGATGTCTGAAATGGTGAGCAAGGGCGAGGAGCTGTTC<br>ACCGGGGTGGTGCCCATCCTGGTCGAGCTGGACGGCGACGTAAA<br>CGGCCACAAGTTCAGCGTGTCCGGCGAGGGCGAGGGCGATGCCA<br>CCTACGGCAAGCTGACCCTGAAGTTCATCTGCACCACCGGCAAGC<br>TGCCCGTGCCCTGGCCACCCTCGTGACCACCCTGACCTACGGCG<br>TGCAGTGCTTCAGCCGCTACCCCGACCACATGAAGCAGCACGACT<br>TCTTCAAGTCCGCCATGCCCCGAAGGCTACGTCCAGGAGCGCACCA<br>TCTTCTTCAAGGACGACGGCAACTACAAGACCCGCGCCGAGGTG<br>AAGTTCGAGGGCGACACCCTGGTGAACCGCATCGAGCTGAAGGT<br>AGGGATAACAGGGTAATCAGCGAATCGAAATCTCTCTCTTGAAGCG<br>GGTTCTATCTAGTTACGCGTTAAACCAACTAGAAAATTTTTTT |
| PRNP 400 bp<br>Insertion TJ-<br>pegRNA | GCAGTGGT<br>GGGGGGCC<br>TTGG | GCATGTTTTACGATAGATGGTGAGCAAGGGCGAGGAGCTGTTC<br>ACCGGGGTGGTGCCCATCCTGGTCGAGCTGGACGGCGACGTAAA<br>CGGCCACAAGTTCAGCGTGTCCGGCGAGGGCGAGGGCGATGCCA<br>CCTACGGCAAGCTGACCCTGAAGTTCATCTGCACCACCGGCAAGC<br>TGCCCGTGCCCTGGCCACCCTCGTGACCACCCTGACCTACGGCG<br>TGCAGTGCTTCAGCCGCTACCCCGACCACATGAAGCAGCACGACT<br>TCTTCAAGTCCGCCATGCCCCGAAGGCTACGTCCAGGAGCGCACCA<br>TCTTCTTCAAGGACGACGGCAACTACAAGACCCGCGCCGAGGTG<br>TCTTCTTCAAGGACGACGGCAACTACAAGACCCGCGCCGAGGTG<br>AAGTTCGAGGGCGACACCCTGGTGAACCGCATCGAGCTGAAGGT                                                   |

|                                       |                              |                                                                                                                                                                                                                                                                                                                                                                                                                                                                                                                                                                                                                                                                                                                                                                                                                                                                                                                                                                                                                  |
|---------------------------------------|------------------------------|------------------------------------------------------------------------------------------------------------------------------------------------------------------------------------------------------------------------------------------------------------------------------------------------------------------------------------------------------------------------------------------------------------------------------------------------------------------------------------------------------------------------------------------------------------------------------------------------------------------------------------------------------------------------------------------------------------------------------------------------------------------------------------------------------------------------------------------------------------------------------------------------------------------------------------------------------------------------------------------------------------------|
|                                       |                              | AGGGATAACAGGGTAATAGGCCCCCAACCATCTCTCTCTTGA<br>CGCGGTTCTATCTAGTTACGCGTTAAACCAACTAGAAA<br>TTTTTTTT                                                                                                                                                                                                                                                                                                                                                                                                                                                                                                                                                                                                                                                                                                                                                                                                                                                                                                                 |
| GFP 89 bp<br>replacement<br>TJ-pegRNA | AGTTCAGC<br>GTGTCCGG<br>CTT  | GTCAGGGTGGTCA<br>CGAGCGTAGGCCAGGGAACAGGCAGCTTACC<br>CGTTGTGCAAATGAATTTGAGTGTGAGTTTCCCATAGGTGGC<br>ATCGCCCTCGCCCTCGCCGGACACGCTGATAAATATCTTGA<br>CGCGGTTCTATCTAGTTACGCGTTAAACCAACTAGAAA<br>TTTTTTTT                                                                                                                                                                                                                                                                                                                                                                                                                                                                                                                                                                                                                                                                                                                                                                                                                |
| SA-Puro<br>insertion<br>TJ-pegRNA     | GATGGAGC<br>CAGAGAG<br>GATCC | GCAGCTCAGGTTCTGGGTCAGGCACCGGGCTTGC<br>GGGTCATGCACAGGTGCGCGGTCCTTCGGGCACCTCGAC<br>GTCGGCGGTGACGGTG AAGCCGAGCCGCTCGTAGAAGGGGAG<br>GTTGTGGGGCGCGGAGGTCTCCAGGAAGGCGGGCACC<br>CCCGGCGCGCTCGGCCGCTCCACTCCGGGAGCACGAC<br>GGCGCTGCCAGACCCTTGCCCTGGTGGTTCGGGCGAG<br>ACGCGGTGGCCAGGAACACGCGGGCTCCTTGGGC<br>CGGTGCGGCGCCAGGAGGCCTTCCATCTGTTGCTGCG<br>CGGCCAGCCGGAACCGCTCAACTCGGCCATGCGCGGG<br>CCGATCTCGGCGAACCCGCCCCGCTTCGACGCTCTCC<br>GGCGTGGTCCAGACCGCCCGCGGCGCAGTCGTCCGCG<br>ACCCACACCTTGTGATGTCGAGCCCGACGCGCGTGA<br>GGAAGATTCTTGCAGCTCGGTGACCCGCTCGATGTGG<br>CGGTGACCCGCTCGATCGACGGTGTGGCGCGTGGCG<br>GGTAGTCGCGAACCGCGGCGAGGGTGCGTACGGCCCT<br>GGGGACGTCGTCGCGGGTGGCGAGGCGACCGTGGG<br>CTTGTACTCGGTCATTGGGCCAGGATTCTCCTCGAC<br>GTCACCGCATGTTAGCAGACTTCTCTGCCCTCTCCG<br>CTGCCAGATCTCTCGAGGCCCTGTGGGAGGAAGAGA<br>AGAGGTCAGAAAGCTTTCCTCTCTGGCTCTCTCTCT<br>TGA<br>CGCGGTTCTATCTAGTTACGCGTTAAACCAACTAGAAA<br>TTTTTTTT                                                                                                          |
| SA-GFP<br>insertion<br>TJ-pegRNA      | GATGGAGC<br>CAGAGAG<br>GATCC | GCAGCTCAGGTTCTGGGTCAGAAATTCCTTGTACAG<br>CTCGTCCATGCCGAGAGTGATCCCGGCGCGGTCACGA<br>ACTCCAGCAGGACCATGTGATCGCGCTTCTCGTTGGG<br>GCTTTGCTCAGGGCGGACTGGGTGCTCAGGTAGTGG<br>TTGTCGGGCAGCAGCACGGGGCCGTCGCCGATGGGG<br>GTGTTCTGCTGGTAGTGGTCGGCGAGCTGCACGCTG<br>CCGTCCTCGATGTTGTGGCGGATCTTGAAGTTCACCT<br>TGATGCCGTTCTCTGCTTGTGCGCCATGATATAGAC<br>GTTGTGGCTGTTGTAGTTGATCTCCAGCTTGTGCCC<br>CAGGATGTTGCCGTCTCCTTGAAGTCGATGCCCTT<br>CAGCTCGATGCGGTTACACAGGGTGTGCGCCCTCGA<br>ACTCACCTCGGCGCGGGTCTTGTAGTTGCCGTCGTC<br>CCTTGAAGAAGATGGTGCCTCCTGGACGTAGCCTTC<br>GGGCATGGCGGACTTGAAGAAGTCTCGTGCTGCTT<br>CATGTGGTCGGGGTAGCGGCTGAAGCACTGCA<br>CGCCGTAGGTACAGGGTGGTCACGAGGGTGGGCCA<br>GGGCACGGGAGCTTGCCGTAGGTGGCATCGCCCTC<br>GCCCTCGCCGACACGCTGAACTTGTGGCCGTTTAC<br>GTCGCCGTCCAGCTCGACCAGGATGGGCACCACCC<br>CGGTG AACAGCTCCTCGCCCTTGCTCACTGGGCCA<br>GGATTCTCCTCGACGTCACCGCATGTTAGCAGACTT<br>CCTCTGCCCTCTCCGCTGCCAGATCTCTCAGGCCCT<br>GTGGGAGGAAGAGAAGAGGTCAGAAAGCTTTCCT<br>CTCTCTCTTGA<br>CGCGGTTCTATCTAGTTACGCGTTAAACCAACTAGAAA<br>TTTTTTTT |
| AAVSI split<br>circular TJ-<br>pegRNA |                              | AGACCCTCGACCGTCGATTGTCCACTGGTCAACAATAGATGACTT<br>ACAATAATCGGAAGGTGCAGAGACTCGACGGGAGCTACCCTAA<br>CGTCAAGACGAGGGTAAAGAGAGAGTCCAATTCTCAAAGCCAAT<br>AGGCAGTAGCGAAAGCTGCAAGAGAATGAAAATCCGTTGACCTT<br>AAACGGTCGTGTGGGTTCAAGTCCCTCCACCCACGCGGAAAC<br>GCAATAGCCGAAAAACAAAAAAGCACATGAGGATCACCCATGTG<br>CGCAGCTCAGGTTCTGGGATAACTTCGTATAATGTATGCTATACG<br>AAGTTATAACAATCCCCCAACTGAGAGA<br>ACTCAAAGGTTACCCAGTTGGGGCACATTACCCTGTTATCCCTAT<br>TCCTCTCTGGCTCCATCGTAAGCAAACCTTAGAGGTTCTGGCAAG<br>CAAAAAACAAAAACGGCTATTATGCGTTACCGCGAGACGCTACG<br>GACTTAAATAATTGAG                                                                                                                                                                                                                                                                                                                                                                                                                                                                |

|                            |                              |                                                                                                                                                                                                           |
|----------------------------|------------------------------|-----------------------------------------------------------------------------------------------------------------------------------------------------------------------------------------------------------|
|                            |                              | CCTTAAAGAAGAAATTCCTTAAAGTGGATGCTCTCAAACCTCAGGGA<br>AACCTAAATCTAGTTATAGACAAGGCAATCCTGAGCCAAGCCGA<br>AGTAGTAATTAGTAAGACCAGTGGACAATCGACGGATAACAGCA<br>TATCTAG                                                |
| <i>Fah</i> TJ-<br>pegRNA-1 | GTAGGCCC<br>TGGGAACA<br>GATT | TAAGAACAGAACATCAGAGGAAGCTGGGCCACCAGGCATTACCG<br>CTCCAGTCGTTTCATCAAACCATTCCAAATATGTGCTCGTGAGCC<br>TTGGAAATGGGAATGGGTTCCACCGAATCTGTTCCAGGGCTATAT<br>ATCTAGACGCGGTTCTATCTAGTTACGCGTTAAACCAACTAGAAT<br>TTTTTT |
| <i>Fah</i> TJ-<br>pegRNA-2 | GTAGGCCC<br>TGGGAACA<br>GATT | TCAGAGGAAGCTGGGCCACCACATTACCGCTCCAATCATTTCATCA<br>AAACCATTCCAAATATATGCTCGTGAGCCTTGGAGATCGGAATGG<br>GTTACCAAACCTGTTCCAGGGCTATATATCTAGACGCGGTTCT<br>ATCTAGTTACGCGTTAAACCAACTAGAATTTTTTT                     |

| Nicking sgRNA                     | spacer sequence (5'-3') |
|-----------------------------------|-------------------------|
| <i>AAVS1</i> nicking sgRNA        | GCAGCTCAGGTTCTGGGAGA    |
| <i>HEK3</i> nicking sgRNA         | GTCAACCAGTATCCCGGTGC    |
| <i>HEK3</i> control nicking sgRNA | GCACATACTAGCCCCTGTCT    |
| <i>PRNP</i> nicking sgRNA         | GCATGTTTTTCACGATAGTAA   |
| <i>IDS</i> nicking sgRNA          | ACTGAGGGATGTCTGAAGGC    |
| TLR reporter nicking sgRNA        | TAGGTCAGGGTGGTCACGA     |
| <i>Fah</i> nicking sgRNA-1        | CCCTAAGAACAGAACATCAG    |
| <i>Fah</i> nicking sgRNA-2        | CAGAGGAAGCTGGGCCACC     |

**Supplementary Table 2.** Sequences of primers used for genomic DNA amplification.

|              | F (5'-3')                 | R (5'-3')            |
|--------------|---------------------------|----------------------|
| <i>AAVS1</i> | CTTGCCAGAACCTCTAAGGT      | CCAGGATCAGTGAAACGCAC |
| <i>HEK3</i>  | TCTGCTGCAAGTAAGCATGCATTTG | GCCCTTCCAGGGACCTC    |
| <i>PRNP</i>  | AGTAAGCCAAAAACCAACATG     | CTGTACTCATCCATGGGCCT |
| <i>IDS</i>   | ACGTTGAGCTGTGCAGAGAA      | GTGCGTATGGAATAGCCCAT |

**Supplementary Table 3.** Sequences of primers used for ddPCR.

| Gene         | F (5'-3')                                                 | R (5'-3')                    | Probe                                                                              |
|--------------|-----------------------------------------------------------|------------------------------|------------------------------------------------------------------------------------|
| <i>AAVS1</i> | CTTGCCAGAACCTCT<br>AAGGT                                  | GCTGAACTTGTGGCC<br>GTTT      | Ins CACCACCCCGGTGAACAGCTC                                                          |
| <i>HEK3</i>  | GCATGCATTTGTAGG<br>CTTGATG                                | CAGCCAAACTTGTC<br>ACCAG      | WT CCTGGCCTGGGTCAATCCTTGG<br>Ins CACGGGCAGCTTGCCGGTGG<br>Ins CACCACCCCGGTGAACAGCTC |
| <i>PRNP</i>  | F GTCAGTGGAAACAA<br>GCCGAGT<br>F TAGGTCAGGGTGG<br>TCACGAG | ACTTGGTTGGGGTAA<br>C<br>GGTG | WT TGAAGCACATGGCTGGTGCTGC<br>Ins CACGGGCAGCTTGCCGGTGG<br>Ins CACCACCCCGGTGAACAGCTC |
| <i>IDS</i>   | F GCTGAACTTGTGG<br>CCGTTT<br>F TAGGTCAGGGTGG<br>TCACGAG   | GTGCGTATGGAATAG<br>CCCAT     | Ins CACCACCCCGGTGAACAGCTC<br>Ins CACGGGCAGCTTGCCGGTGG                              |



|             |                          |                          |                          |
|-------------|--------------------------|--------------------------|--------------------------|
| <i>CCR5</i> | TAGGTCAGGGTGGT<br>CACGAG | TTCCTGGGAGAGACG<br>CAAAC | Ins CACGGGCAGCTTGCCGGTGG |
|-------------|--------------------------|--------------------------|--------------------------|

**Supplementary Table 4.** Sequences of primers used for high throughput sequencing.

| <b>Gene</b>  | <b>F (5'-3')</b>                               | <b>R (5'-3')</b>                               |
|--------------|------------------------------------------------|------------------------------------------------|
| <i>AAVSI</i> | AGACGTGTGCTCTTCCGATCTTGCC<br>AGAACCTCTAAGGT    | CTACACGACGCTCTTCCGATCTCCAGGAT<br>CAGTGAAACGCAC |
| <i>Fah</i>   | CTACACGACGCTCTTCCGATCTACCAA<br>CTTTCTCCATGGCAG | AGACGTGTGCTCTTCCGATCTTGTCCCAT<br>ACCCAACCTCCTG |
