# Supplementary material for: Template-jumping prime editing enables large insertion and exon rewriting in vivo
Source: PubMed Central journal article supplement (PMC10250319; doi:10.1038/s41467-023-39137-6), 2023-06-08
Supplement: 41467_2023_39137_MOESM2_ESM.pdf [file 41467_2023_39137_MOESM2_ESM.pdf]

## Reporting Summary

Nature Portfolio wishes to improve the reproducibility of the work that we publish. This form provides structure for consistency and transparency in reporting. For further information on Nature Portfolio policies, see our [Editorial Policies](#) and the [Editorial Policy Checklist](#).

### Statistics

For all statistical analyses, confirm that the following items are present in the figure legend, table legend, main text, or Methods section.

n/a Confirmed

- |                                     |                                     |                                                                                                                                                                                                                                                            |
|-------------------------------------|-------------------------------------|------------------------------------------------------------------------------------------------------------------------------------------------------------------------------------------------------------------------------------------------------------|
| <input type="checkbox"/>            | <input checked="" type="checkbox"/> | The exact sample size ( $n$ ) for each experimental group/condition, given as a discrete number and unit of measurement                                                                                                                                    |
| <input type="checkbox"/>            | <input checked="" type="checkbox"/> | A statement on whether measurements were taken from distinct samples or whether the same sample was measured repeatedly                                                                                                                                    |
| <input checked="" type="checkbox"/> | <input type="checkbox"/>            | The statistical test(s) used AND whether they are one- or two-sided<br><i>Only common tests should be described solely by name; describe more complex techniques in the Methods section.</i>                                                               |
| <input checked="" type="checkbox"/> | <input type="checkbox"/>            | A description of all covariates tested                                                                                                                                                                                                                     |
| <input checked="" type="checkbox"/> | <input type="checkbox"/>            | A description of any assumptions or corrections, such as tests of normality and adjustment for multiple comparisons                                                                                                                                        |
| <input type="checkbox"/>            | <input checked="" type="checkbox"/> | A full description of the statistical parameters including central tendency (e.g. means) or other basic estimates (e.g. regression coefficient) AND variation (e.g. standard deviation) or associated estimates of uncertainty (e.g. confidence intervals) |
| <input checked="" type="checkbox"/> | <input type="checkbox"/>            | For null hypothesis testing, the test statistic (e.g. $F$ , $t$ , $r$ ) with confidence intervals, effect sizes, degrees of freedom and $P$ value noted<br><i>Give <math>P</math> values as exact values whenever suitable.</i>                            |
| <input checked="" type="checkbox"/> | <input type="checkbox"/>            | For Bayesian analysis, information on the choice of priors and Markov chain Monte Carlo settings                                                                                                                                                           |
| <input checked="" type="checkbox"/> | <input type="checkbox"/>            | For hierarchical and complex designs, identification of the appropriate level for tests and full reporting of outcomes                                                                                                                                     |
| <input checked="" type="checkbox"/> | <input type="checkbox"/>            | Estimates of effect sizes (e.g. Cohen's $d$ , Pearson's $r$ ), indicating how they were calculated                                                                                                                                                         |

*Our web collection on [statistics for biologists](#) contains articles on many of the points above.*

### Software and code

Policy information about [availability of computer code](#)

Data collection

Data analysis

For manuscripts utilizing custom algorithms or software that are central to the research but not yet described in published literature, software must be made available to editors and reviewers. We strongly encourage code deposition in a community repository (e.g. GitHub). See the Nature Portfolio [guidelines for submitting code & software](#) for further information.

### Data

Policy information about [availability of data](#)

All manuscripts must include a [data availability statement](#). This statement should provide the following information, where applicable:

- Accession codes, unique identifiers, or web links for publicly available datasets
- A description of any restrictions on data availability
- For clinical datasets or third party data, please ensure that the statement adheres to our [policy](#)

A reporting summary for this article is available as a Supplementary Information file. The raw sequencing data have been deposited in the NCBI BioProject database under accession code PRJNA973981.

## Human research participants

Policy information about [studies involving human research participants and Sex and Gender in Research](#).

|                             |                                                             |
|-----------------------------|-------------------------------------------------------------|
| Reporting on sex and gender | <input type="text" value="No human research participants"/> |
| Population characteristics  | <input type="text" value="No human research participants"/> |
| Recruitment                 | <input type="text" value="No human research participants"/> |
| Ethics oversight            | <input type="text" value="No human research participants"/> |

Note that full information on the approval of the study protocol must also be provided in the manuscript.

## Field-specific reporting

Please select the one below that is the best fit for your research. If you are not sure, read the appropriate sections before making your selection.

Life sciences     Behavioural & social sciences     Ecological, evolutionary & environmental sciences

For a reference copy of the document with all sections, see [nature.com/documents/nr-reporting-summary-flat.pdf](https://www.nature.com/documents/nr-reporting-summary-flat.pdf)

## Life sciences study design

All studies must disclose on these points even when the disclosure is negative.

|                 |                                                                                                                                                                                                                                                                                                                                                                                                                                                                                                                   |
|-----------------|-------------------------------------------------------------------------------------------------------------------------------------------------------------------------------------------------------------------------------------------------------------------------------------------------------------------------------------------------------------------------------------------------------------------------------------------------------------------------------------------------------------------|
| Sample size     | <input type="text" value="1x10&lt;sup&gt;5&lt;/sup&gt; cells were used for editing in culture system. All cell samples were evaluated in at least biological triplicates (n = 3) to ensure the reproductability. Our previous editing studies have shown that this sample size and replications are sufficient to ensure reproducibility (Liu et al, Nature Biotechnology; Jiang et al, Nature Biotechnology; Song et al, Nature Biomedical Engineering,2019 and Ibraheim et al, Nature Communications, 2021)."/> |
| Data exclusions | <input type="text" value="No data was excluded."/>                                                                                                                                                                                                                                                                                                                                                                                                                                                                |
| Replication     | <input type="text" value="All the culture-related experiments were done in biological triplicate in culture cells, n=3 ,on different days (every three days). All attempts at replication were successful, and standard deviations were in the expected ranges."/>                                                                                                                                                                                                                                                |
| Randomization   | <input type="text" value="After seeding cell into 24-well plate, we randomly decided which well is for experiment group or control group. Group allocation for animal study was performed randomly."/>                                                                                                                                                                                                                                                                                                            |
| Blinding        | <input type="text" value="It is not applied to molecular and cell experiments. Groups were labeled. All mouse work are blind."/>                                                                                                                                                                                                                                                                                                                                                                                  |

## Reporting for specific materials, systems and methods

We require information from authors about some types of materials, experimental systems and methods used in many studies. Here, indicate whether each material, system or method listed is relevant to your study. If you are not sure if a list item applies to your research, read the appropriate section before selecting a response.

### Materials & experimental systems

| n/a                                 | Involvement in the study                                        |
|-------------------------------------|-----------------------------------------------------------------|
| <input type="checkbox"/>            | <input checked="" type="checkbox"/> Antibodies                  |
| <input type="checkbox"/>            | <input checked="" type="checkbox"/> Eukaryotic cell lines       |
| <input checked="" type="checkbox"/> | <input type="checkbox"/> Palaeontology and archaeology          |
| <input type="checkbox"/>            | <input checked="" type="checkbox"/> Animals and other organisms |
| <input checked="" type="checkbox"/> | <input type="checkbox"/> Clinical data                          |
| <input checked="" type="checkbox"/> | <input type="checkbox"/> Dual use research of concern           |

### Methods

| n/a                                 | Involvement in the study                           |
|-------------------------------------|----------------------------------------------------|
| <input checked="" type="checkbox"/> | <input type="checkbox"/> ChIP-seq                  |
| <input type="checkbox"/>            | <input checked="" type="checkbox"/> Flow cytometry |
| <input checked="" type="checkbox"/> | <input type="checkbox"/> MRI-based neuroimaging    |

## Antibodies

|                 |                                                                                                                                      |
|-----------------|--------------------------------------------------------------------------------------------------------------------------------------|
| Antibodies used | <input type="text" value="Fumarylacetoacetate hydrolase antibody (ab83770, Abcam Inc), IHC 1:400"/>                                  |
| Validation      | <input type="text" value="The specificity of the anti-Fah antibody has previously been confirmed(Yin et al, Nature Biotech,2016)."/> |

## Eukaryotic cell lines

Policy information about [cell lines and Sex and Gender in Research](#)

|                                                                   |                                                                                                                                                                                                    |
|-------------------------------------------------------------------|----------------------------------------------------------------------------------------------------------------------------------------------------------------------------------------------------|
| Cell line source(s)                                               | HEK293T cells (ATCC) and HEK293T-TLR cells, A549 (ATCC), U-2 OS (ATCC)                                                                                                                             |
| Authentication                                                    | HEK293T, A549 and U-2 OS cells were acquired from ATCC validated by supplier (ATCC) by STR analysis. And HEK293T-TLR cells were validated using specific primers to amplify the inserted cassette. |
| Mycoplasma contamination                                          | All cell lines tested negative for mycoplasma contamination                                                                                                                                        |
| Commonly misidentified lines (See <a href="#">ICLAC</a> register) | The cell lines used in this article are not in the list of misidentified lines.                                                                                                                    |

## Animals and other research organisms

Policy information about [studies involving animals; ARRIVE guidelines](#) recommended for reporting animal research, and [Sex and Gender in Research](#)

|                         |                                                               |
|-------------------------|---------------------------------------------------------------|
| Laboratory animals      | 4-8 weeks transgenic Fah mutant mice were used in this study. |
| Wild animals            | No wild animals were used in the study.                       |
| Reporting on sex        | Female and male mice were used in this study.                 |
| Field-collected samples | No field collected samples were used in the study.            |
| Ethics oversight        | All animal study protocols were approved by the UMass IACUC   |

Note that full information on the approval of the study protocol must also be provided in the manuscript.

## Flow Cytometry

### Plots

Confirm that:

- The axis labels state the marker and fluorochrome used (e.g. CD4-FITC).
- The axis scales are clearly visible. Include numbers along axes only for bottom left plot of group (a 'group' is an analysis of identical markers).
- All plots are contour plots with outliers or pseudocolor plots.
- A numerical value for number of cells or percentage (with statistics) is provided.

### Methodology

|                           |                                                                                                                                      |
|---------------------------|--------------------------------------------------------------------------------------------------------------------------------------|
| Sample preparation        | Cell lines were detached and performed Flow cytometry analysis immediately.                                                          |
| Instrument                | MACSQuant                                                                                                                            |
| Software                  | FlowJo                                                                                                                               |
| Cell population abundance | No purification                                                                                                                      |
| Gating strategy           | The cells were first gated based on FSC/FSC-H to select for live single cells. Unedited TLR cells were employed as negative control. |

- Tick this box to confirm that a figure exemplifying the gating strategy is provided in the Supplementary Information.
